# Supplementary figures and images for: Facile one-pot synthesis of multifunctional protamine sulfate-derived carbon dots for antibacterial applications and fluorescence imaging of bacteria
Source: Royal Society of Chemistry journal article supplement (doi:10.1039/d0nj04458j), 2020-12-11

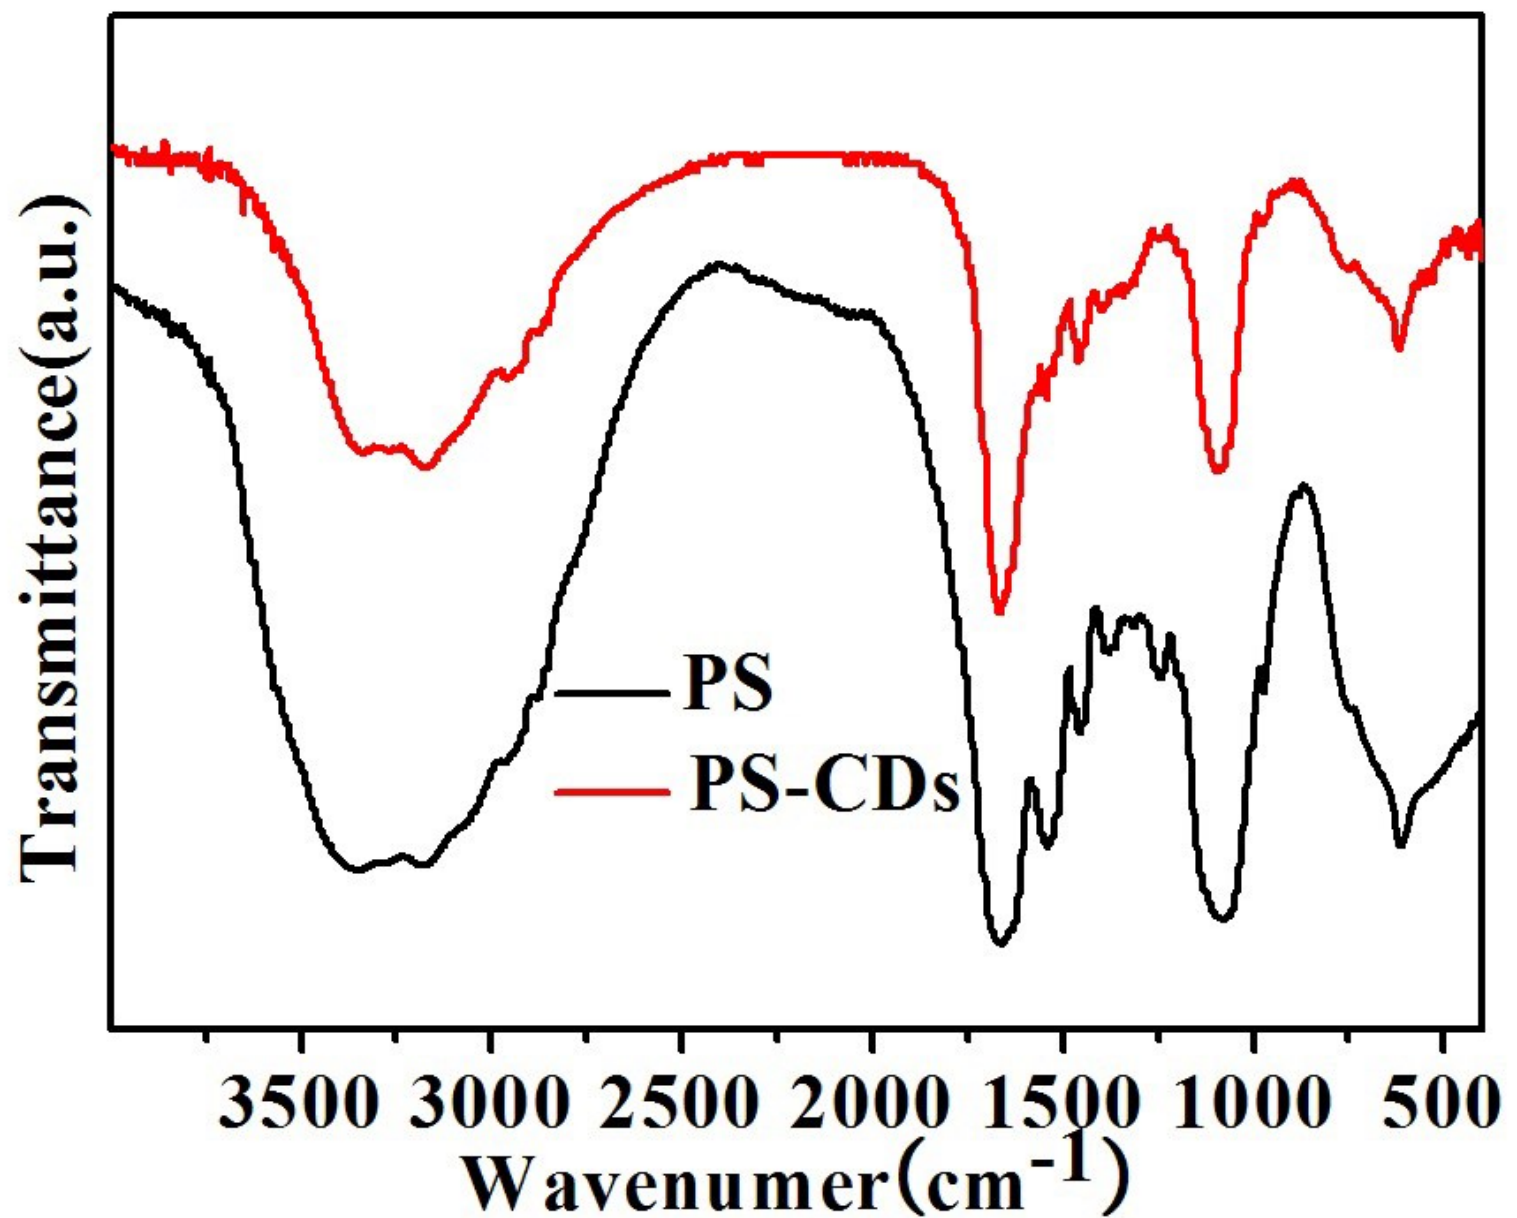

Supplement: d0nj04458j2.pdf [file d0nj04458j2.pdf]

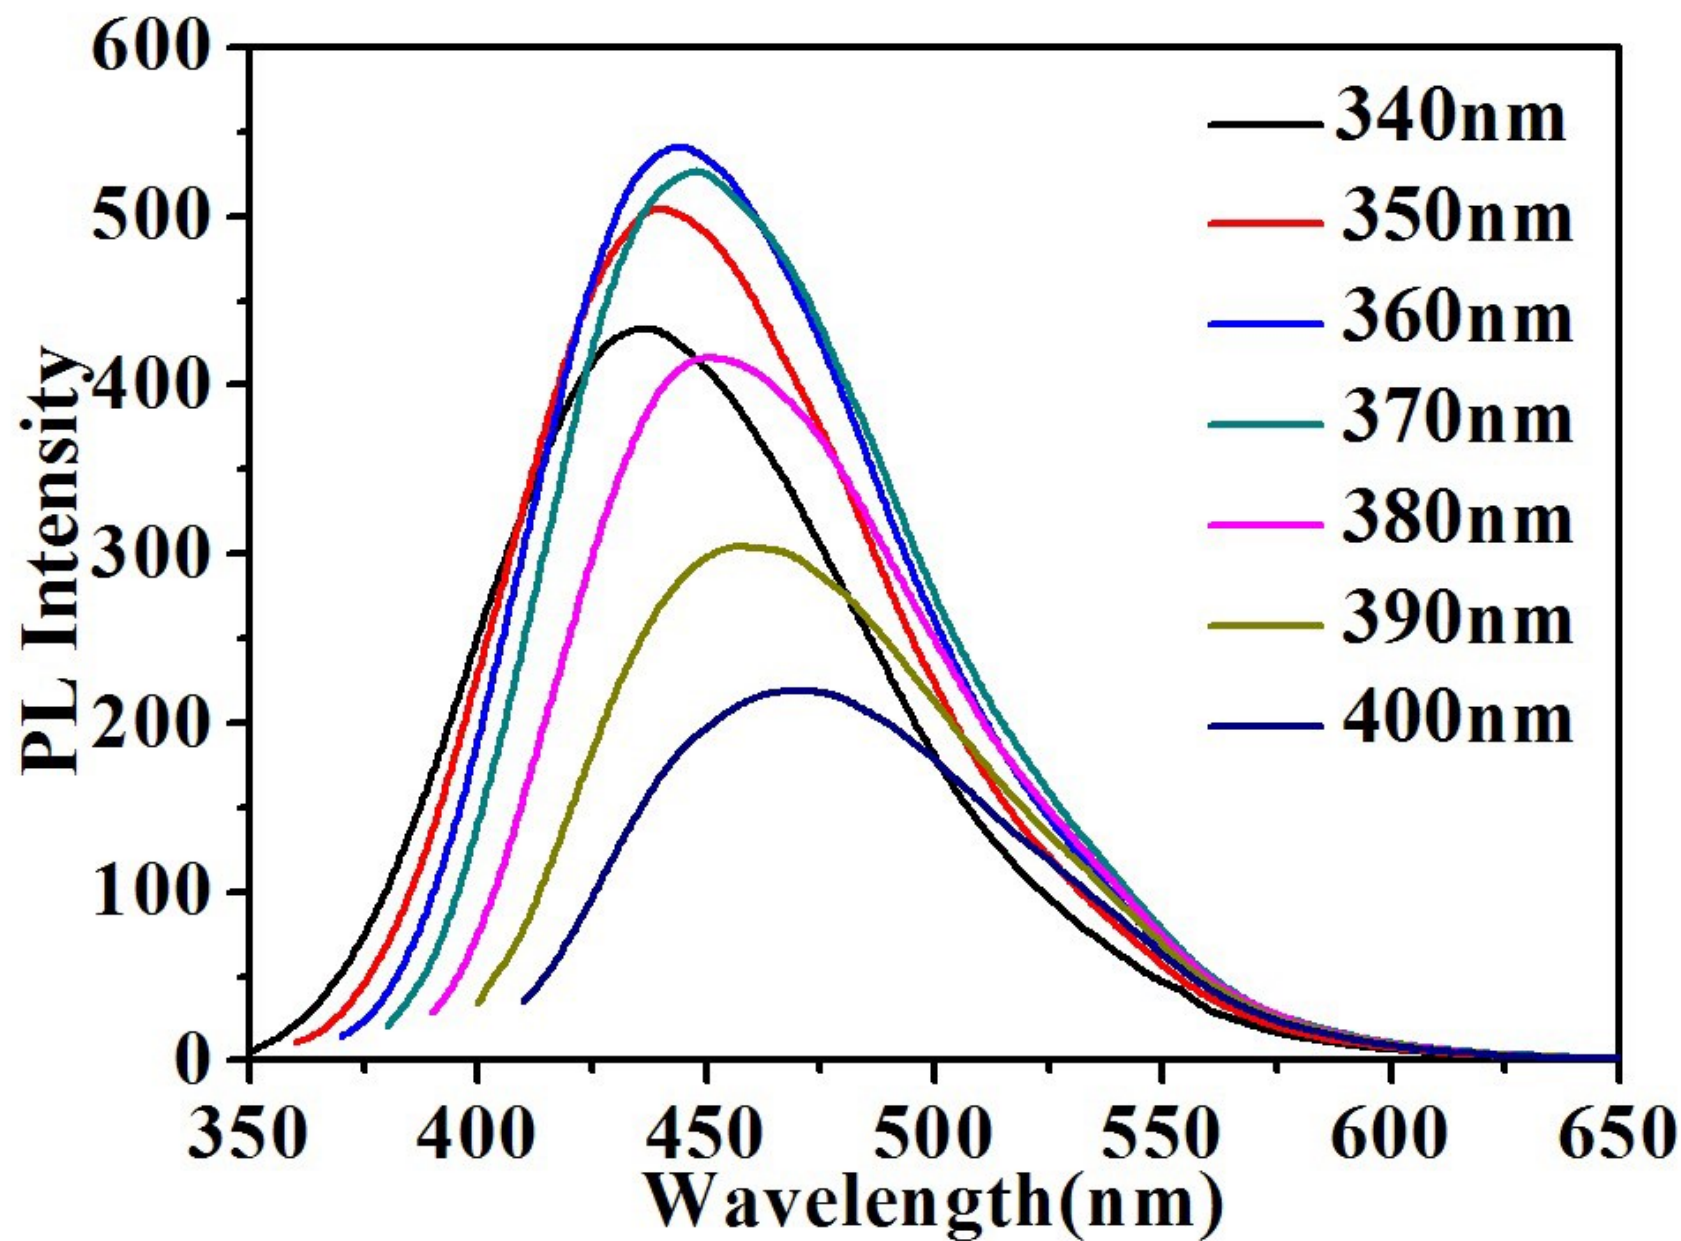

Supplement: d0nj04458j3.pdf [file d0nj04458j3.pdf]
